# Supplementary material for: Theoretical investigation of Cu5/silicates deposited on rutile TiO2 as a photocatalyst
Source: Royal Society of Chemistry journal article supplement (doi:10.1039/d4cp02903h), 2024-01-01
Supplement: d4cp02903h1.pdf [file d4cp02903h1.pdf]

## Supporting Information

### Theoretical investigation of Cu<sub>5</sub>/silicates deposited on rutile

### TiO<sub>2</sub> as a photocatalyst

Fatimah Alhawiti,<sup>a,b</sup> Qingqing Wu,<sup>a\*</sup> David Buceta,<sup>c</sup> Songjun Hou,<sup>a</sup> M. Arturo López-Quintela<sup>c</sup>  
and Colin Lambert<sup>a\*</sup>

a. Physics Department, Lancaster University, Lancaster LA1 4YB, United Kingdom

b. Physics Department, Taif University, Kingdom of Saudi Arabia

c. Lab. Nanomag, Instituto de Investigaciones Tecnológicas, Universidad de Santiago de Compostela, E-15782 Santiago de Compostela, Spain

\* denotes the corresponding authors.

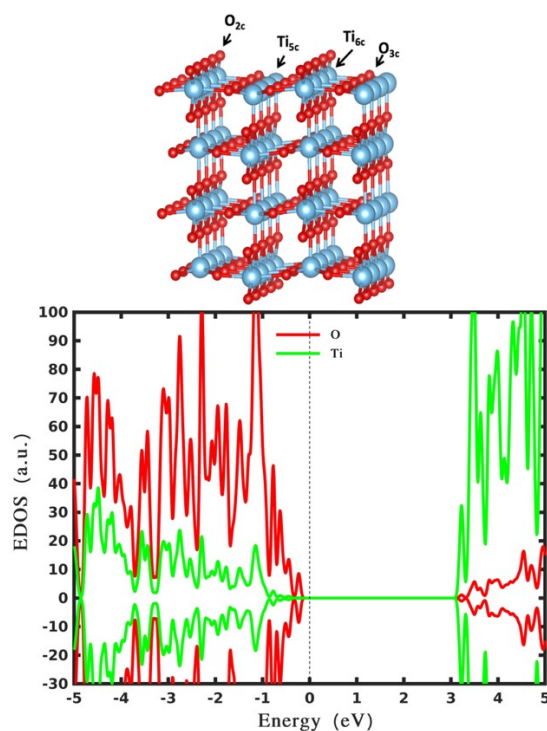

**Fig. S1 Schematic of the rutile  $\text{TiO}_2(110)$  slab model and the corresponding density of states.** Blue and red balls in the left panel represent titanium and oxygen atoms (the color scheme is used in the following figures).  $\text{O}_{2c}$  denotes the two-fold coordinated oxygen atom while  $\text{O}_{3c}$  represents the three-fold coordinated oxygen atom.  $\text{Ti}_{2c}$  stands for the five-fold coordinated titanium atom while  $\text{Ti}_{6c}$  is for the six-fold coordinated titanium atom. The green and red curves depict the projected density of states on titanium and oxygen atoms, while the black curve is the total density of states.

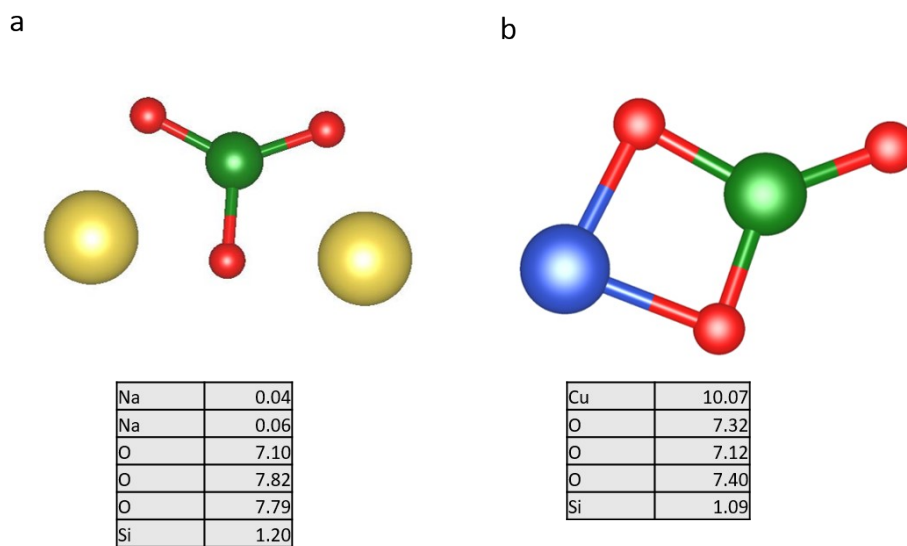

**Fig. S2 Simulations for neutral system  $\text{Na}_2\text{SiO}_3$  (a) and  $\text{CuSiO}_3$  (b).** The yellow ball represents Na atom, the blue represents Cu atom, the red represents O atom, and the green represents Si atom. The bottom tables show the number of valence electrons for each atom.

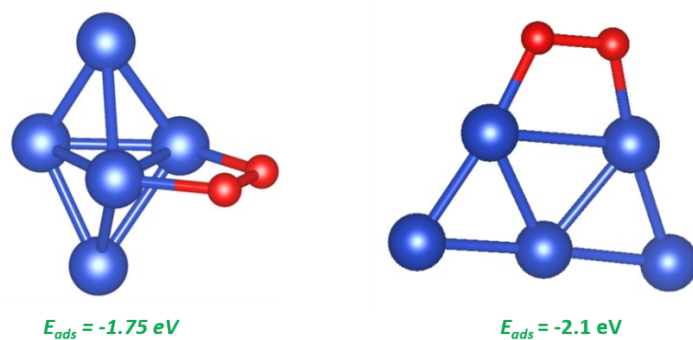

**Fig. S3** One oxygen dimers adsorbed on a pyramidal (a) and trapezoidal (b)  $\text{Cu}_5$  AQC. the green numbers show the adsorption energies of the most stable configurations of oxygen.

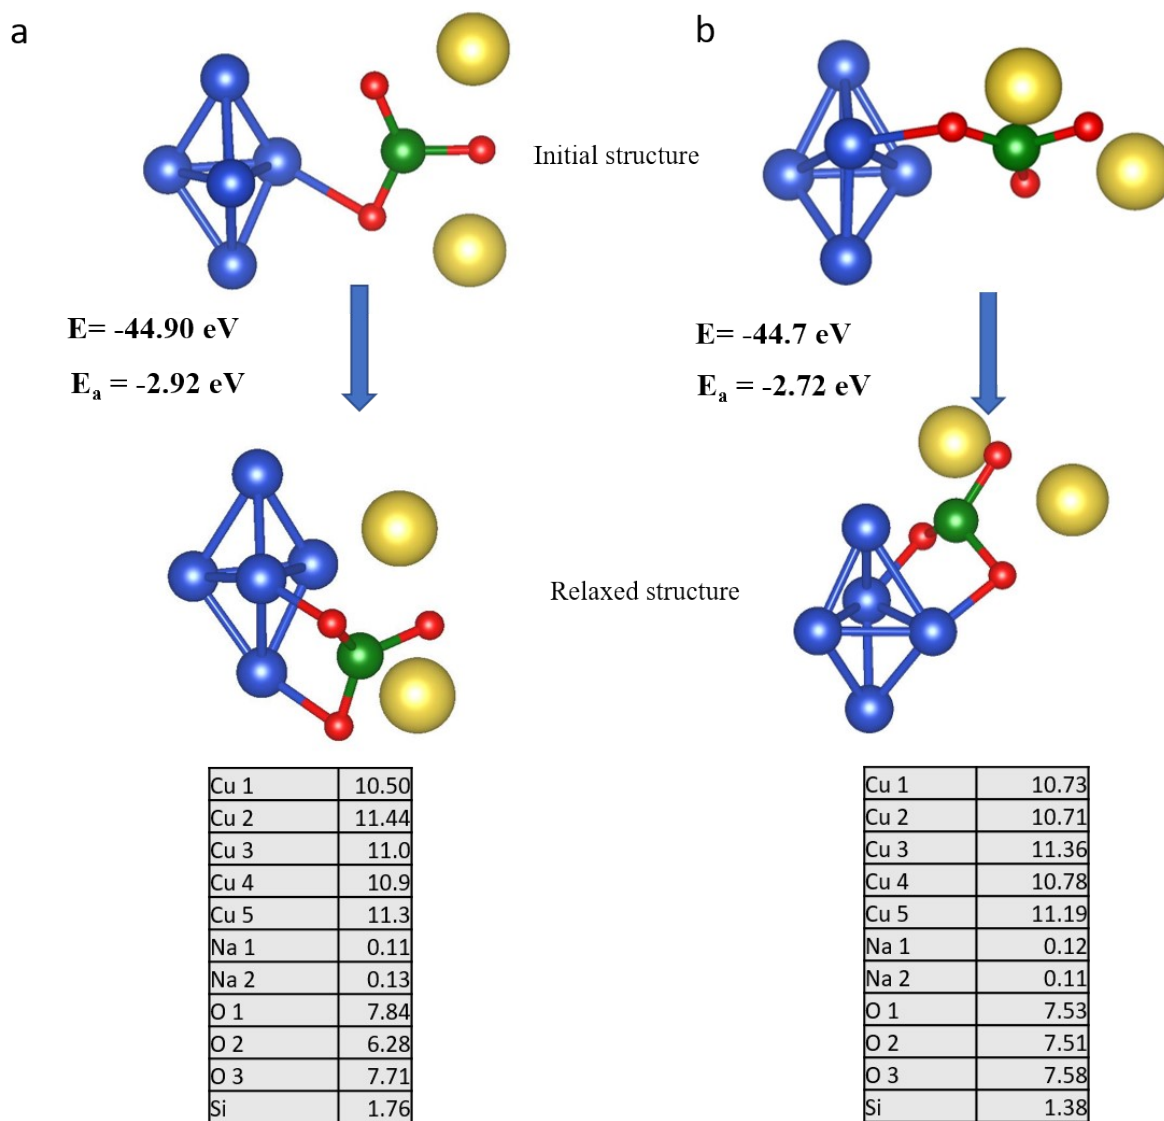

**Fig. S4** Configurations, adsorption energies, and total energy of  $SiO_3^{2-}$  adsorbed on a bipyramidal  $Cu_5$  cluster. Most stable (a), metastable (b). The bottom tables show the number of electrons in the valance bands for each atom.

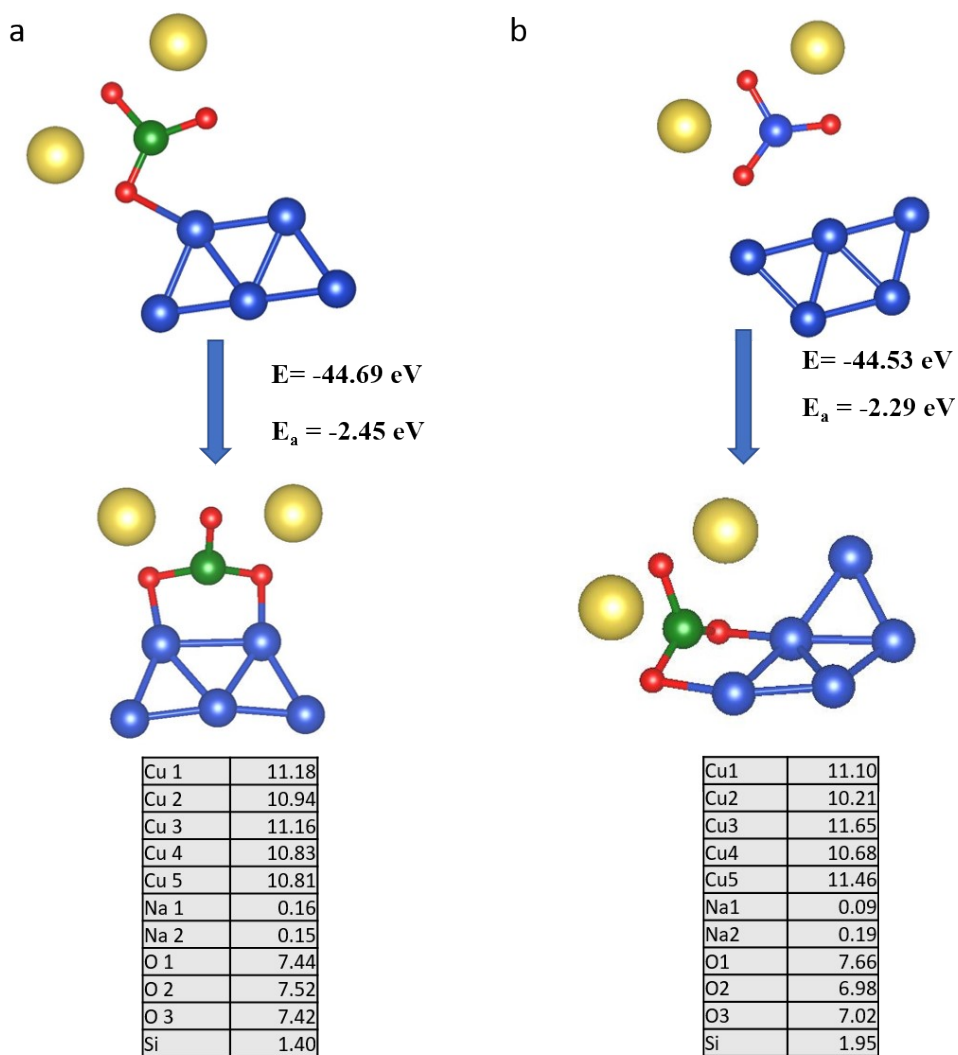

**Fig. S5** Configurations, adsorption energies, and total energy of  $SiO_3^{2-}$  adsorbed on a trapezoidal  $Cu_5$  cluster. Most stable (a), metastable (b). The bottom tables show the number of electrons in the valance bands for each atom.

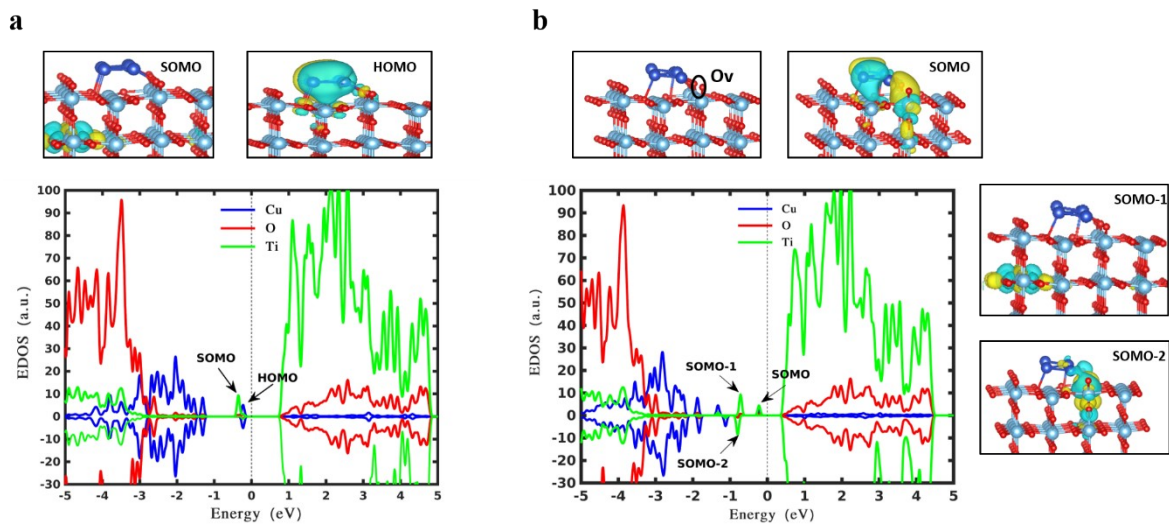

**Fig. S6.** Frontier molecular orbitals and spin density of states of the metastable trapezoidal Cu<sub>5</sub> cluster deposited on a pristine (a) and reduced (b) rutile TiO<sub>2</sub>(110). The green, red, and blue curves represent the states located on titanium, oxygen, and copper atoms respectively. Bader charge analysis reveals that 1.03 electrons (a) ,and 0.77 electrons (b) electrons are transferred from Cu<sub>5</sub> to the support. The dashed line indicates the Fermi energy level of 0 eV.

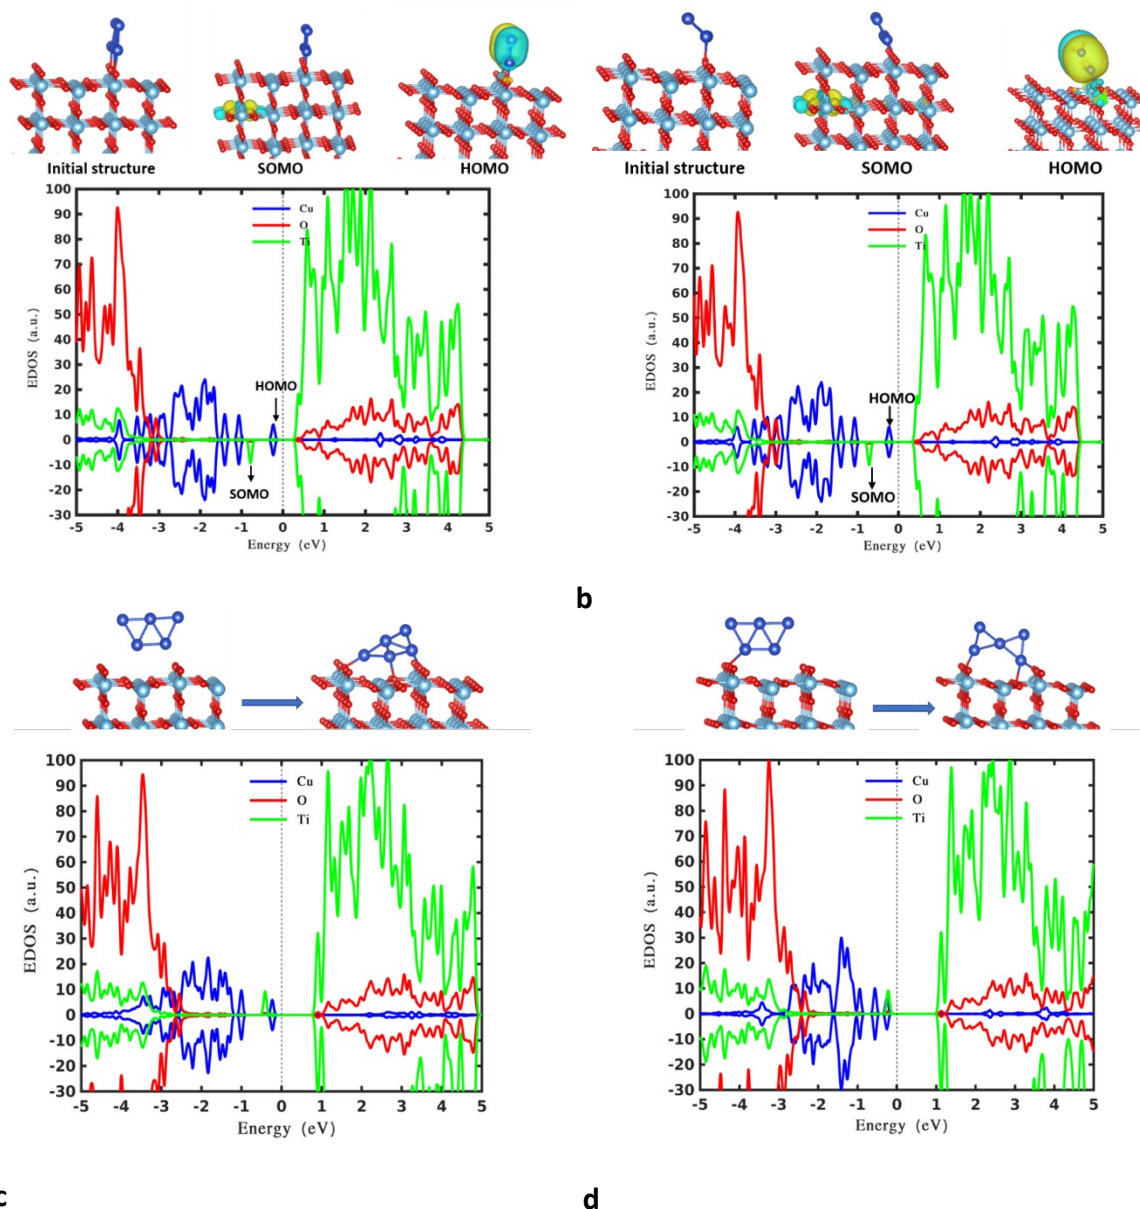

**Fig. S7** Molecular orbitals of trapezoidal (a), and tilted trapezoidal (b)  $\text{Cu}_5$  cluster deposited on rutile  $\text{TiO}_2$  (110) surface, and their corresponding spin densities of states.

The SOMO and HOMO orbitals are presented in the top panels (HOMO: highest occupied molecular orbital). The green, red and blue curves represent the states located on titanium, oxygen, and copper atoms respectively. Bader charge analysis reveals that 0.8 electrons (a), 0.79 electrons (b), 0.87 electrons(c), and 0.8 (d) electrons are transferred from  $\text{Cu}_5$  to the support. The dashed line indicates the Fermi energy level of 0 eV.

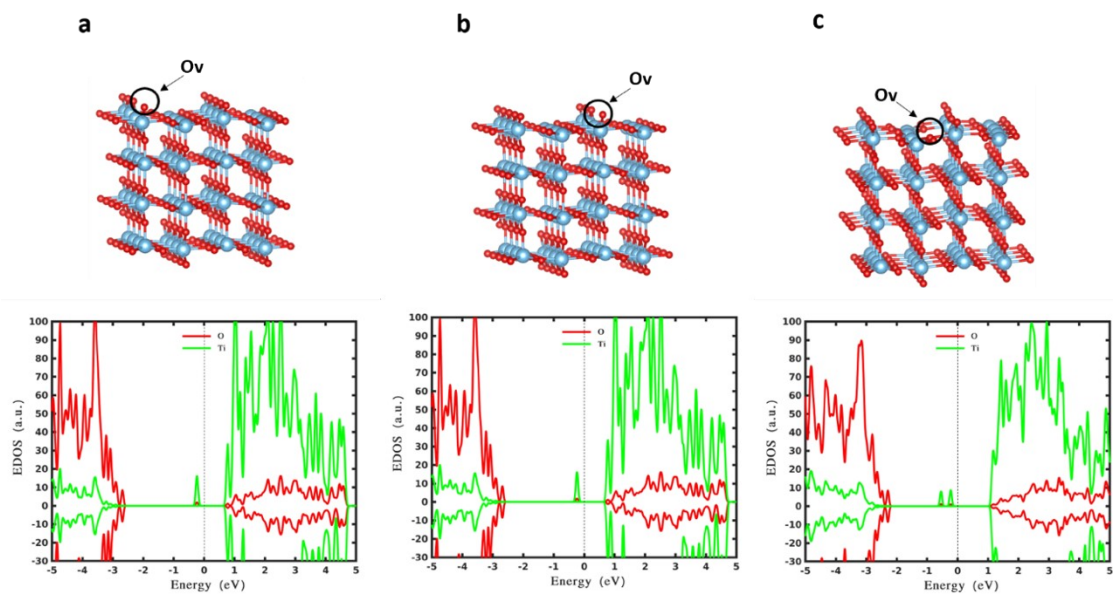

**Fig. S8** Relaxed configurations of reduced TiO<sub>2</sub> for different positions of Oxygen vacancy, and their corresponding spin densities of states.

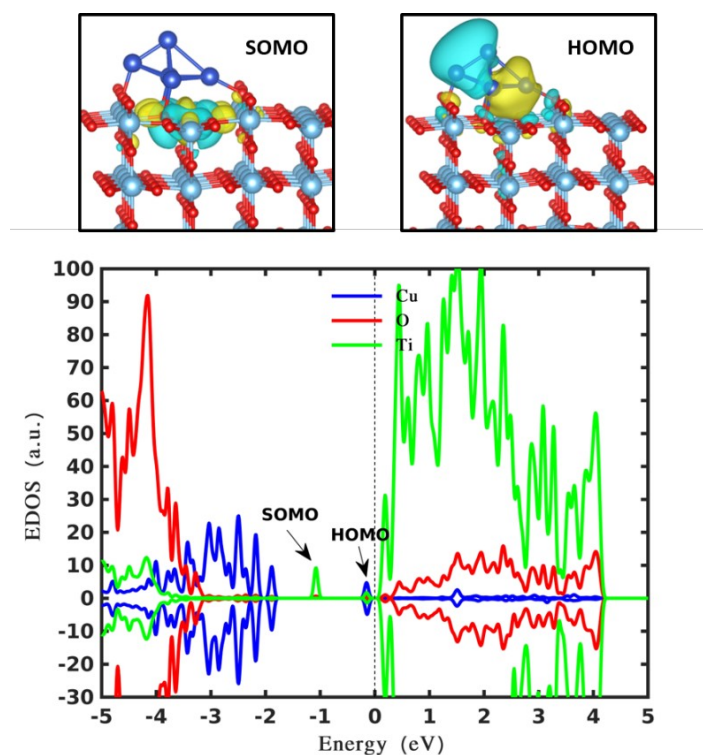

**Fig. S9** Frontier molecular orbitals and spin density of states of the metastable pyramidal  $\text{Cu}_5$  cluster deposited on a pristine rutile  $\text{TiO}_2(110)$ . The green, red, and blue curves represent the states located on titanium, oxygen, and copper atoms respectively. The dashed line indicates the Fermi energy level of 0 eV.

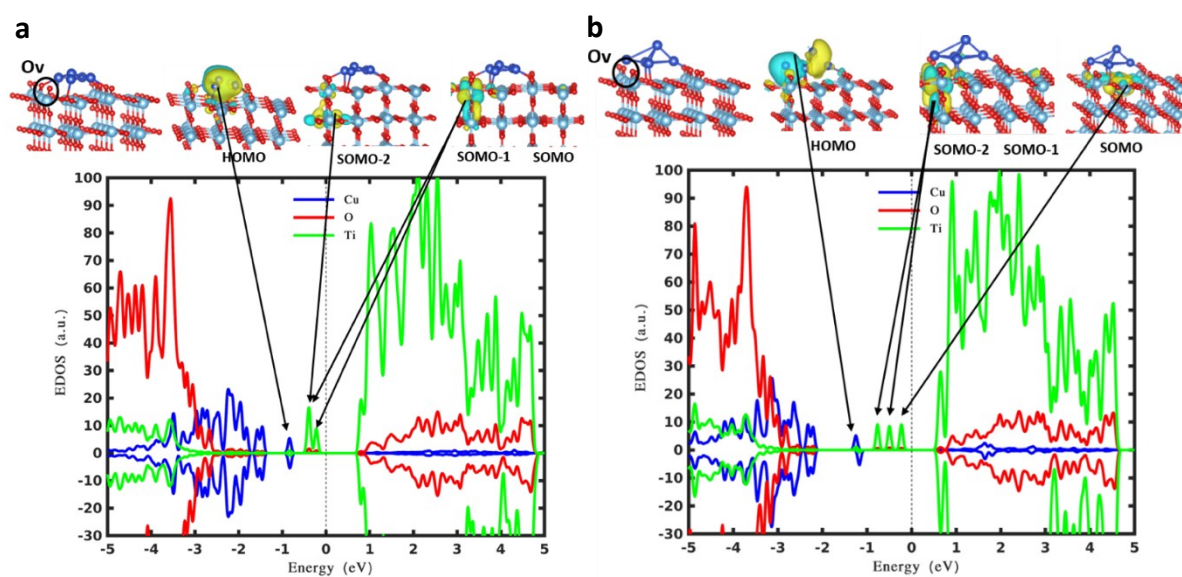



**Fig. S10 Molecular orbitals of trapezoidal (a), and pyramidal (b)  $\text{Cu}_5$  cluster deposited on reduced rutile  $\text{TiO}_2$  (110) surface, and their corresponding spin densities of states.** The

SOMO and HOMO orbitals are presented in the top panels (HOMO: highest occupied molecular orbital). The green, red and blue curves represent the states located on titanium, oxygen, and copper atoms respectively, while the two green peaks between  $-1 \sim 0$  eV stand for the polaronic states located on one 5-fold coordinated  $\text{Ti}^{3+}(3d)$  atom in the surface and one 6-fold coordinated  $\text{Ti}^{3+}(3d)$  in the subsurface. The dashed line indicates the Fermi energy level of 0 eV.

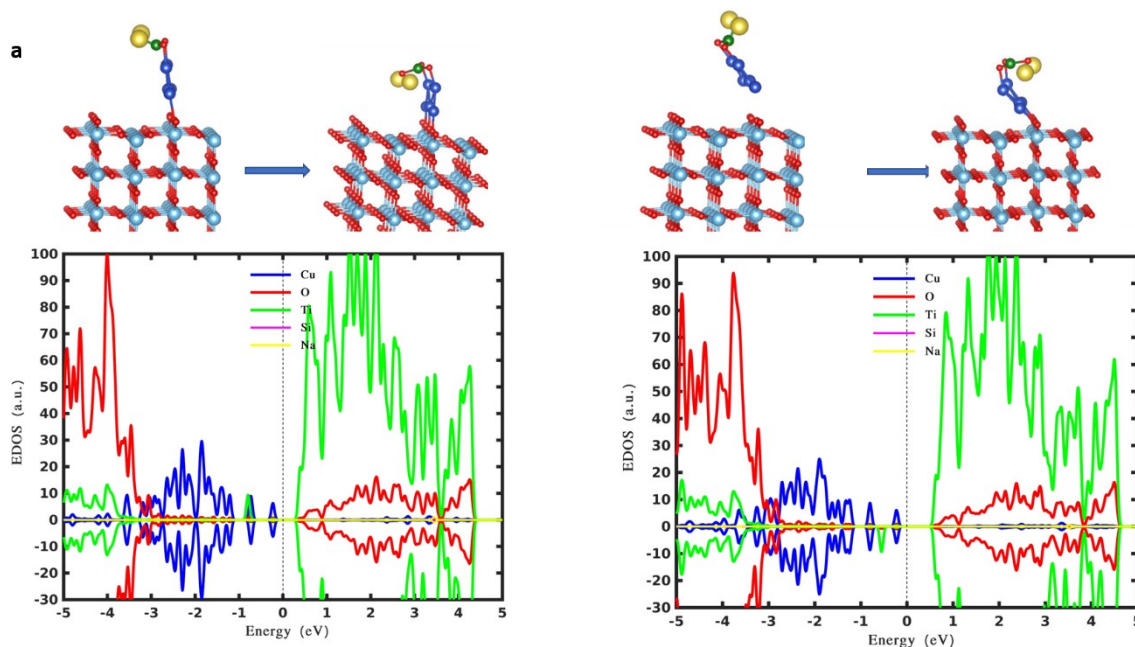

**Fig. Molecular orbitals of trapezoidal (a), and tilted trapezoidal (b)  $\text{Cu}_5$  cluster in the presence of  $\text{SiO}_3^{2-}$  deposited on rutile  $\text{TiO}_2(110)$  surface, and their corresponding spin densities of states.** The SOMO and HOMO orbitals are presented in the top panels (HOMO: highest occupied molecular orbital). The green, red and blue curves represent the states located on titanium, oxygen, and copper atoms respectively. Bader charge analysis reveals that 0.7 electrons (a) and 0.8 electrons (b) are transferred from  $\text{Cu}_5$  to the support. The dashed line indicates the Fermi energy level of 0 eV.

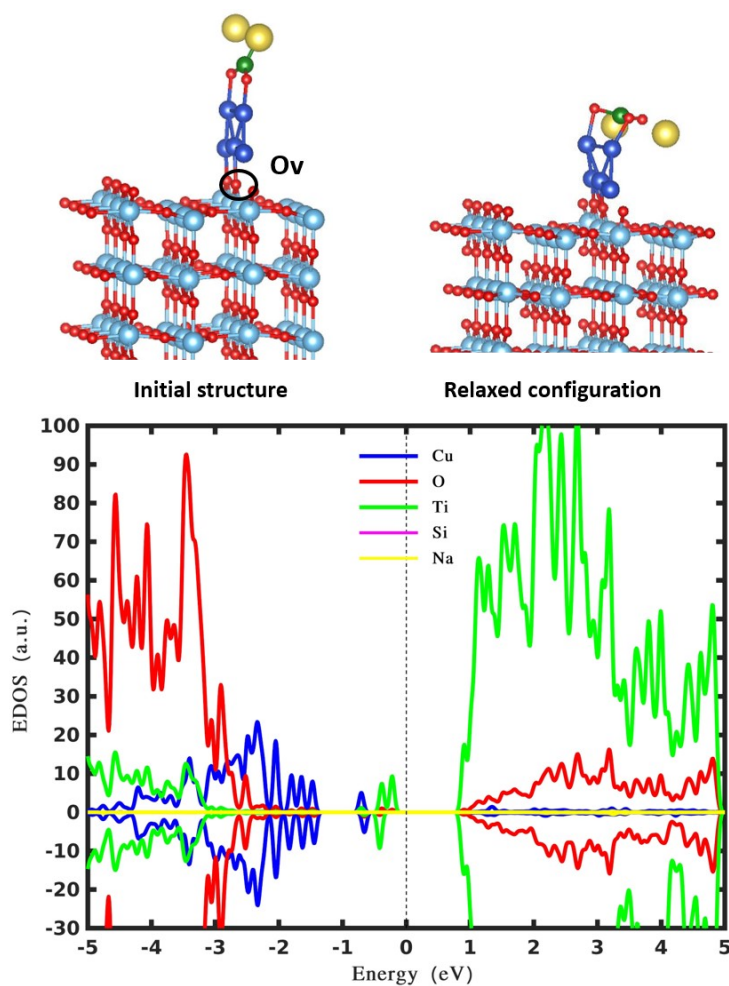

**Fig. S12 Configurations of trapezoidal  $\text{Cu}_5/\text{SiO}_3^{2-}$  deposited on rutile  $\text{TiO}_2(110)$  and the corresponding density of states. The green, red and blue curves represent the states located on Titanium, oxygen, and copper atoms. The dashed line indicates the Fermi energy level of 0 eV.**

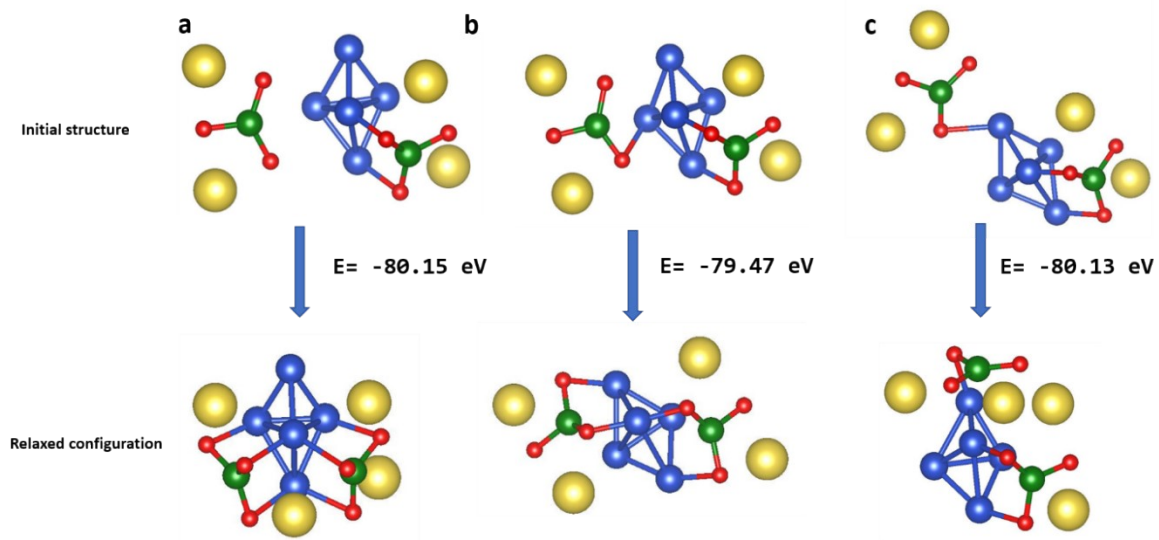

Fig. S13 Configurations and total energy of  $\text{SiO}_3^{2-}$  adsorbed on a pyramidal  $\text{Cu}_5$  cluster.

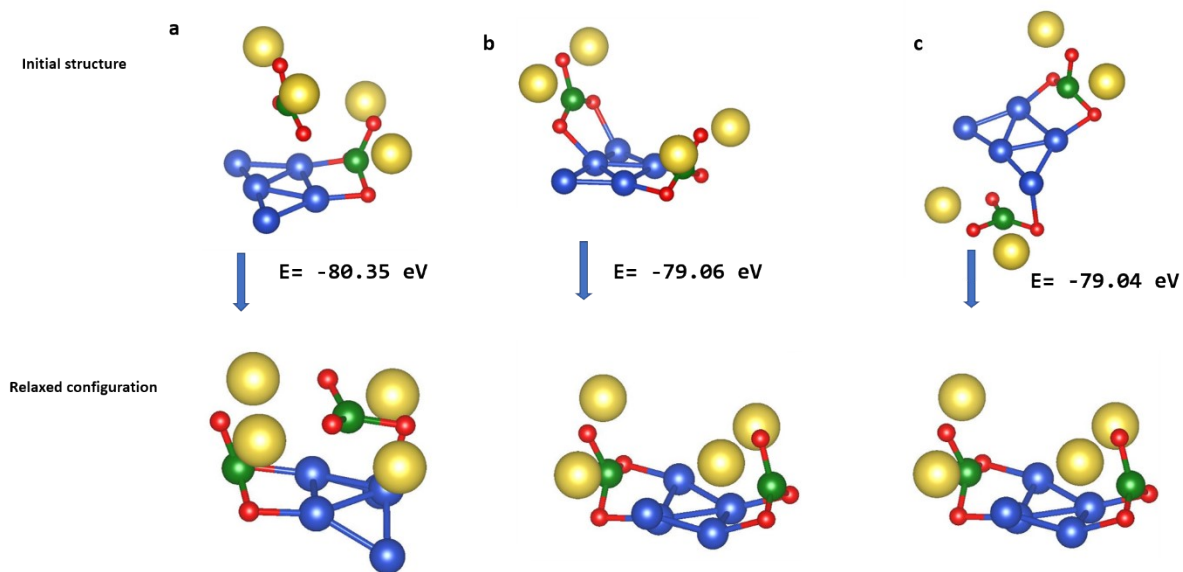

Fig. S14 Configurations and total energy of  $\text{SiO}_3^{2-}$  adsorbed on a trapezoidal  $\text{Cu}_5$  cluster.

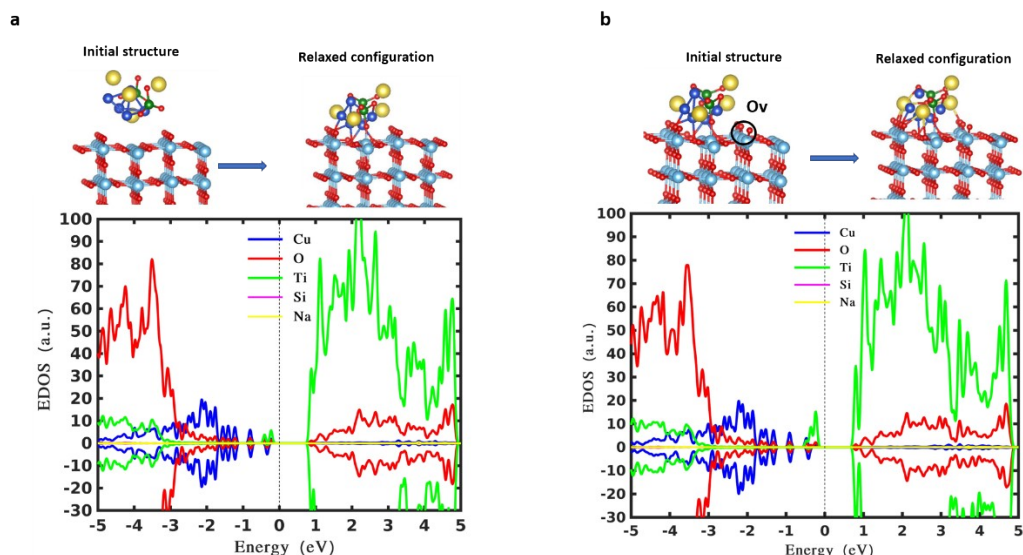

**Fig. S15 Configurations of pyramidal  $\text{Cu}_5/\text{SiO}_3^{2-}$  deposited on perfect (a) and reduced (b) rutile  $\text{TiO}_2(110)$ , and the corresponding density of states.** The green, red and blue curves represent the states located on Titanium, oxygen, and copper atoms. Bader charge analysis reveals that 1.3 electrons (a) and 1.3 electrons (b) are transferred from  $\text{Cu}_5$  to the support. The dashed line indicates the Fermi energy level of 0 eV.

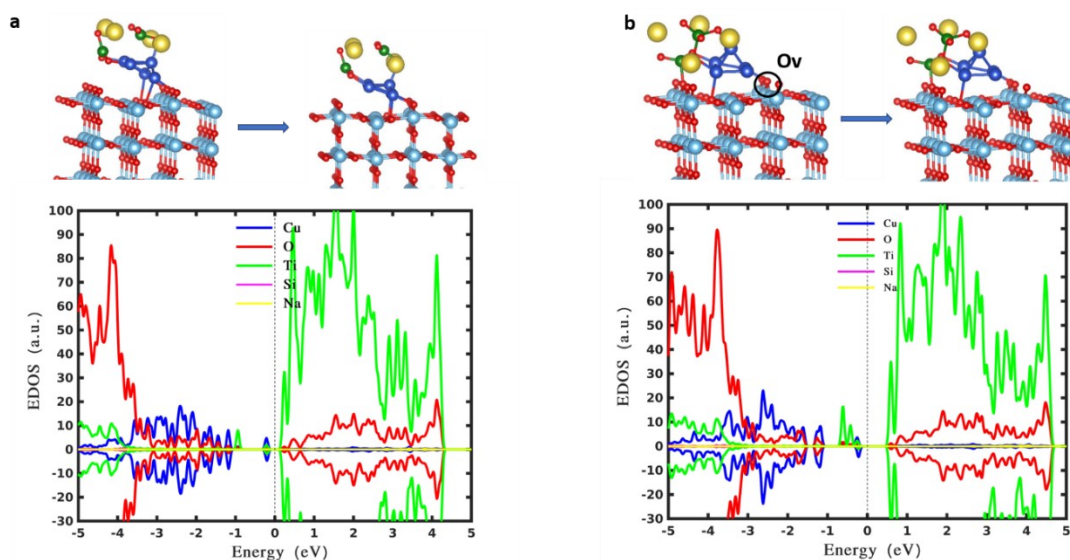

**Fig. S16 Configurations of pyramidal  $\text{Cu}_5/\text{SiO}_3^{2-}$  deposited on perfect (a) and reduced (b) rutile  $\text{TiO}_2(110)$ , and the corresponding density of states.** The green, red and blue curves represent the states located on Titanium, oxygen, and copper atoms. Bader charge analysis

reveals that 1 electron (a) and 0.8 electrons (b) are transferred from  $\text{Cu}_5$  to the support. The dashed line indicates the Fermi energy level of 0 eV.

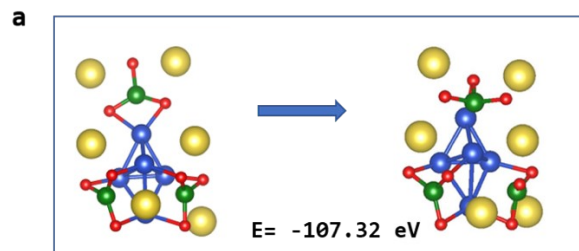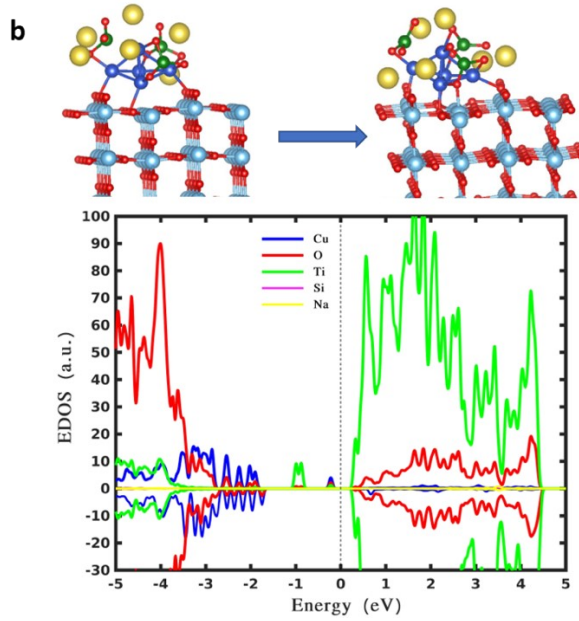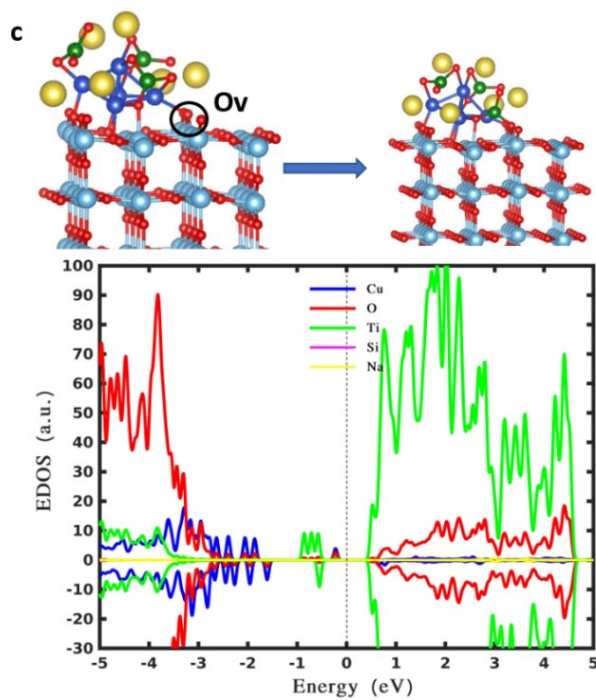

**Fig. S17 Configurations of pyramidal  $\text{Cu}_5/\text{SiO}_3^{2-}$  (a) deposited on perfect (b) and reduced (c) rutile  $\text{TiO}_2(110)$ , and the corresponding density of states. The green, red and blue curves represent the states located on Titanium, oxygen, and copper atoms. Bader charge analysis reveals that 1.5 electrons (a) and 1.5 electrons (b) are transferred from  $\text{Cu}_5$  to the support. The dashed line indicates the Fermi energy level of 0 eV.**

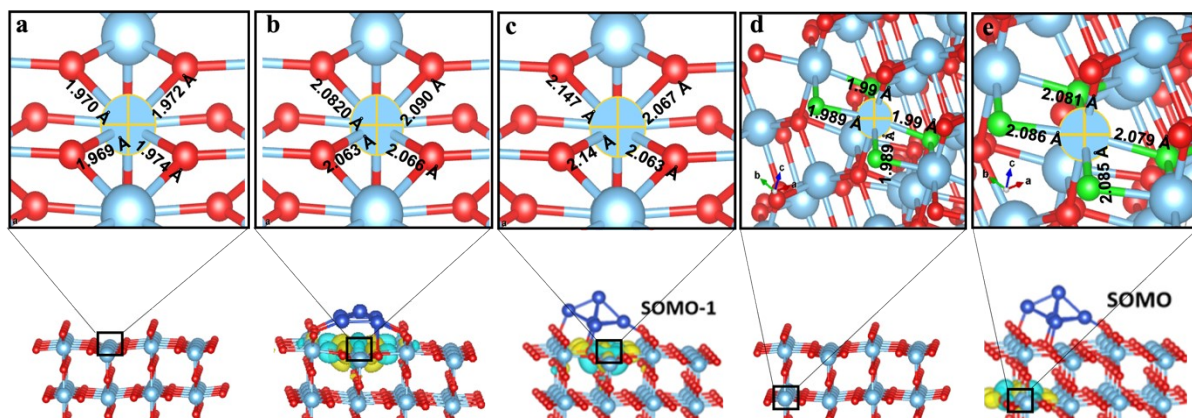

**Fig. S18. Lattice structural distortions induced by the excess electron donated from  $\text{Cu}_5$ . (a, d) A bare and pristine surface and subsurface as references. (b, c, e) Elongated Ti-O bond lengths due to the excess electron transferred from  $\text{Cu}_5$  with different shapes.**

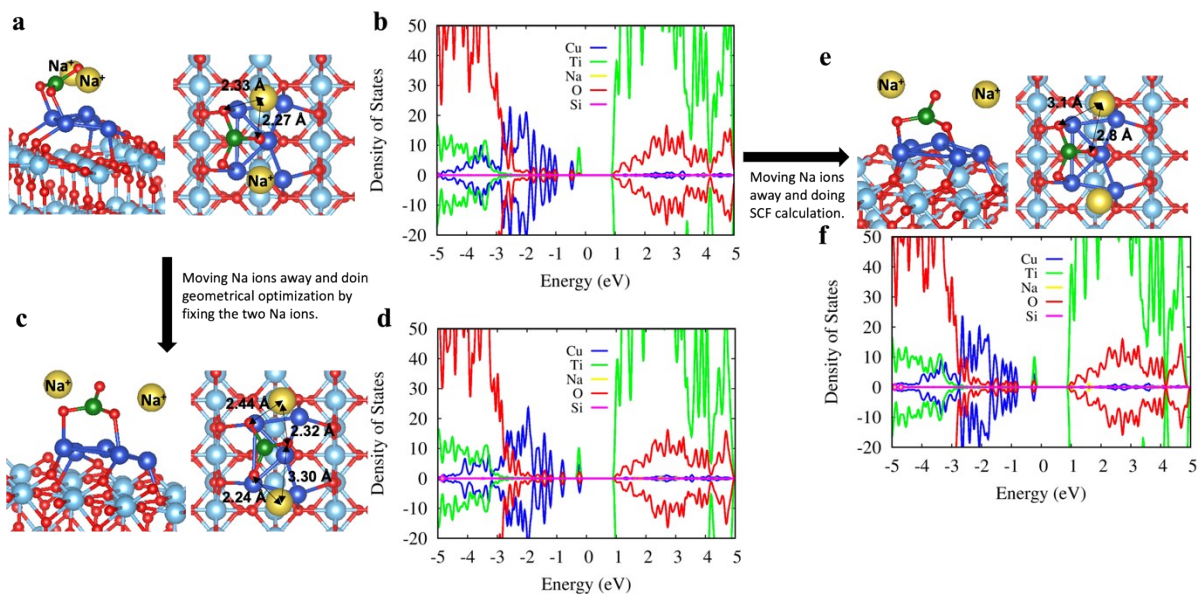

Figure S19. Influence of changing the distance of Na ions from silicate ions. Changing the distance between one of the two Na ions and one of the three O atoms from 2.33 Å (a) to 3.1 Å (e) produces a negligible change in the density of states. During this process, the charge of Na needs to remain +1 (donating one electron to the system). This means that the Na should not be moved too far away, otherwise the +1 charge state would not persist, and the simulation would be unphysical.

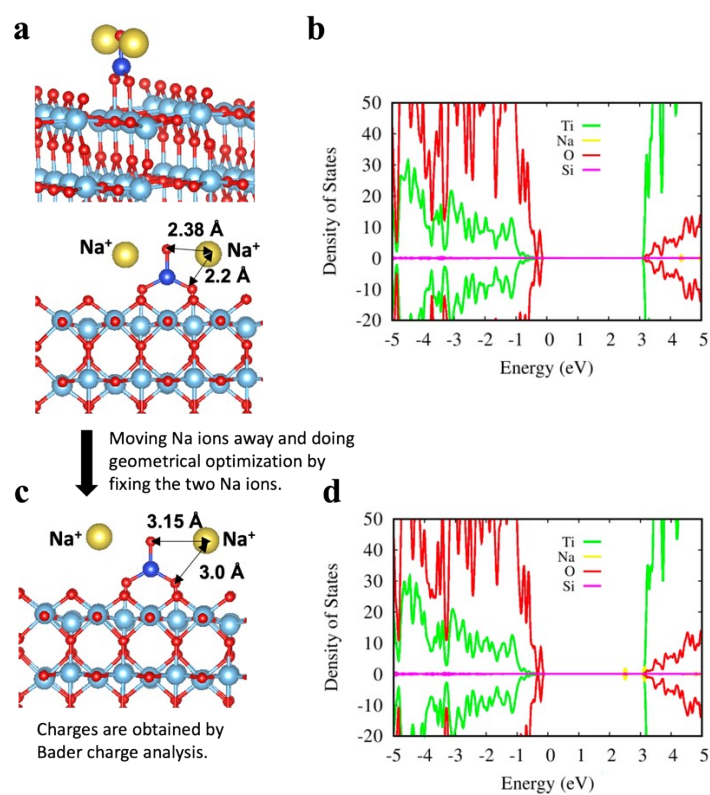

Figure S20. Impact of silicates adsorbed on TiO<sub>2</sub>(110) surface. Different distances between Na ions and silicate (a, c) were tested and negligible impact is observed in terms of the density of states (b, d).
